# Supplementary material
Source: MDPI journal article supplement (https://www.mdpi.com/2076-3417/13/11/6431)
Supplement: s1 [file s1 › applsci-2351064-supplementary.pdf]

# **Air Quality Improvement in Urban Street Canyons: An Assessment of the Effects of Selected Traffic Management Strategies Using OSPM Model**

**Robert Oleniacz \*, Marek Bogacki, Mateusz Rzeszutek, Paulina Bździuch**

Department of Environmental Management and Protection; Faculty of Geo-data Science, Geodesy and Environmental Engineering; AGH University of Science and Technology; Mickiewicza 30 Av., 30-059 Krakow, Poland

\* Correspondence: [oleniacz@agh.edu.pl](mailto:oleniacz@agh.edu.pl)

## **Supplementary Materials**

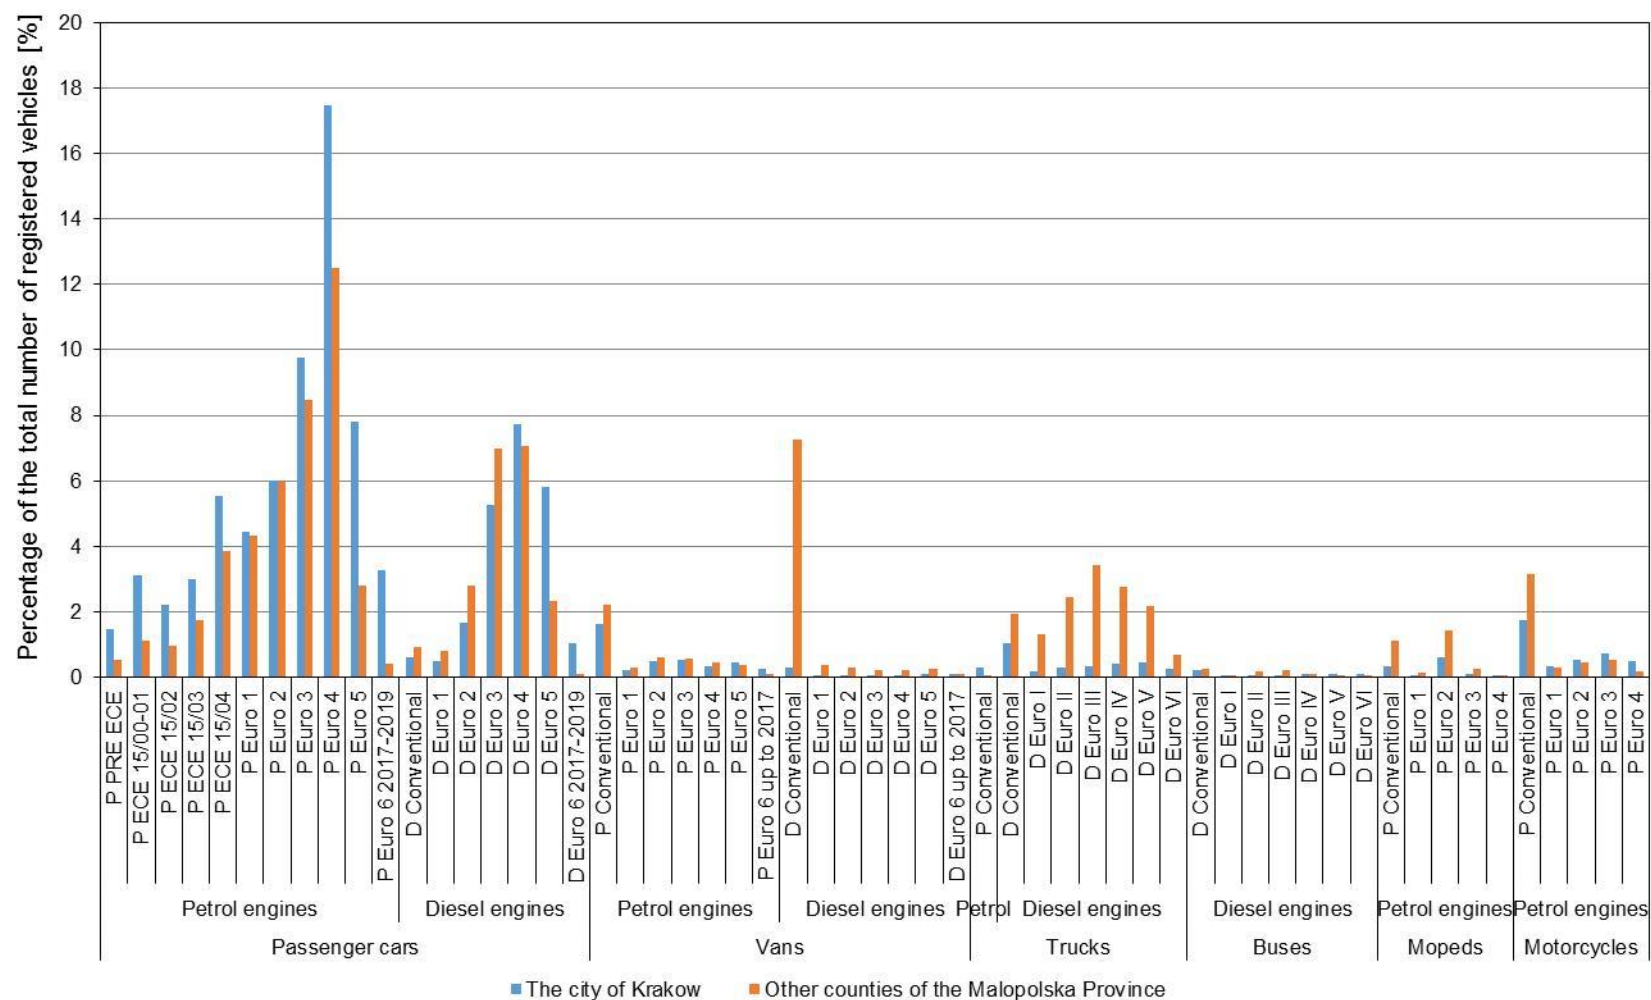

**Figure S1.** Detailed data on vehicles registered in the city of Krakow and other counties of the Malopolska Province in the analyzed period.

**Table S1.** Comparison of the total annual (y), daily average (d) and hourly average (h) traffic volumes of vehicles predicted for individual street canyons and variants. Daily average and hourly average values are estimated, rounded to the full number of vehicles.

| Unit                | Variant | Forecast vehicle traffic volume in the canyon |           |           |            |
|---------------------|---------|-----------------------------------------------|-----------|-----------|------------|
|                     |         | BROD                                          | SOLI      | LIMA      | KRAS       |
| veh·y <sup>-1</sup> | v0      | 2,234,645                                     | 3,521,622 | 8,641,101 | 24,299,303 |
|                     | v1      | 2,005,549                                     | 3,419,242 | 4,768,033 | 23,098,511 |
|                     | v2      | 1,233,045                                     | 3,187,803 | 2,806,552 | 13,408,001 |
|                     | v3      | 725,793                                       | 1,943,180 | 1,838,202 | 7,892,196  |
| veh·d <sup>-1</sup> | v0      | 6,122                                         | 9,648     | 23,674    | 66,573     |
|                     | v1      | 5,495                                         | 9,368     | 13,063    | 63,284     |
|                     | v2      | 3,378                                         | 8,734     | 7,689     | 36,734     |
|                     | v3      | 1,988                                         | 5,324     | 5,036     | 21,622     |
| veh·h <sup>-1</sup> | v0      | 255                                           | 402       | 986       | 2,774      |
|                     | v1      | 229                                           | 390       | 544       | 2,637      |
|                     | v2      | 141                                           | 364       | 320       | 1,531      |
|                     | v3      | 83                                            | 222       | 210       | 901        |

**Table S2.** Average vehicle speeds determined for individual street canyons and variants.

| Time period              | Variant | The assumed average vehicle speed in the canyon [km·h <sup>-1</sup> ] |      |      |      |
|--------------------------|---------|-----------------------------------------------------------------------|------|------|------|
|                          |         | BROD                                                                  | SOLI | LIMA | KRAS |
| 24-hour average          | v0      | 40.3                                                                  | 40.5 | 34.3 | 39.3 |
|                          | v1      | 33.1                                                                  | 38.2 | 34.3 | 32.2 |
|                          | v2      | 40.3                                                                  | 33.4 | 34.3 | 39.3 |
|                          | v3      | 40.3                                                                  | 40.5 | 34.3 | 39.3 |
| 7:00 a.m.<br>- 7:00 p.m. | v0      | 24.1                                                                  | 27.3 | 21.3 | 24.6 |
|                          | v1      | 19.7                                                                  | 25.8 | 21.3 | 20.2 |
|                          | v2      | 24.1                                                                  | 22.5 | 21.3 | 24.6 |
|                          | v3      | 24.1                                                                  | 27.3 | 21.3 | 24.6 |

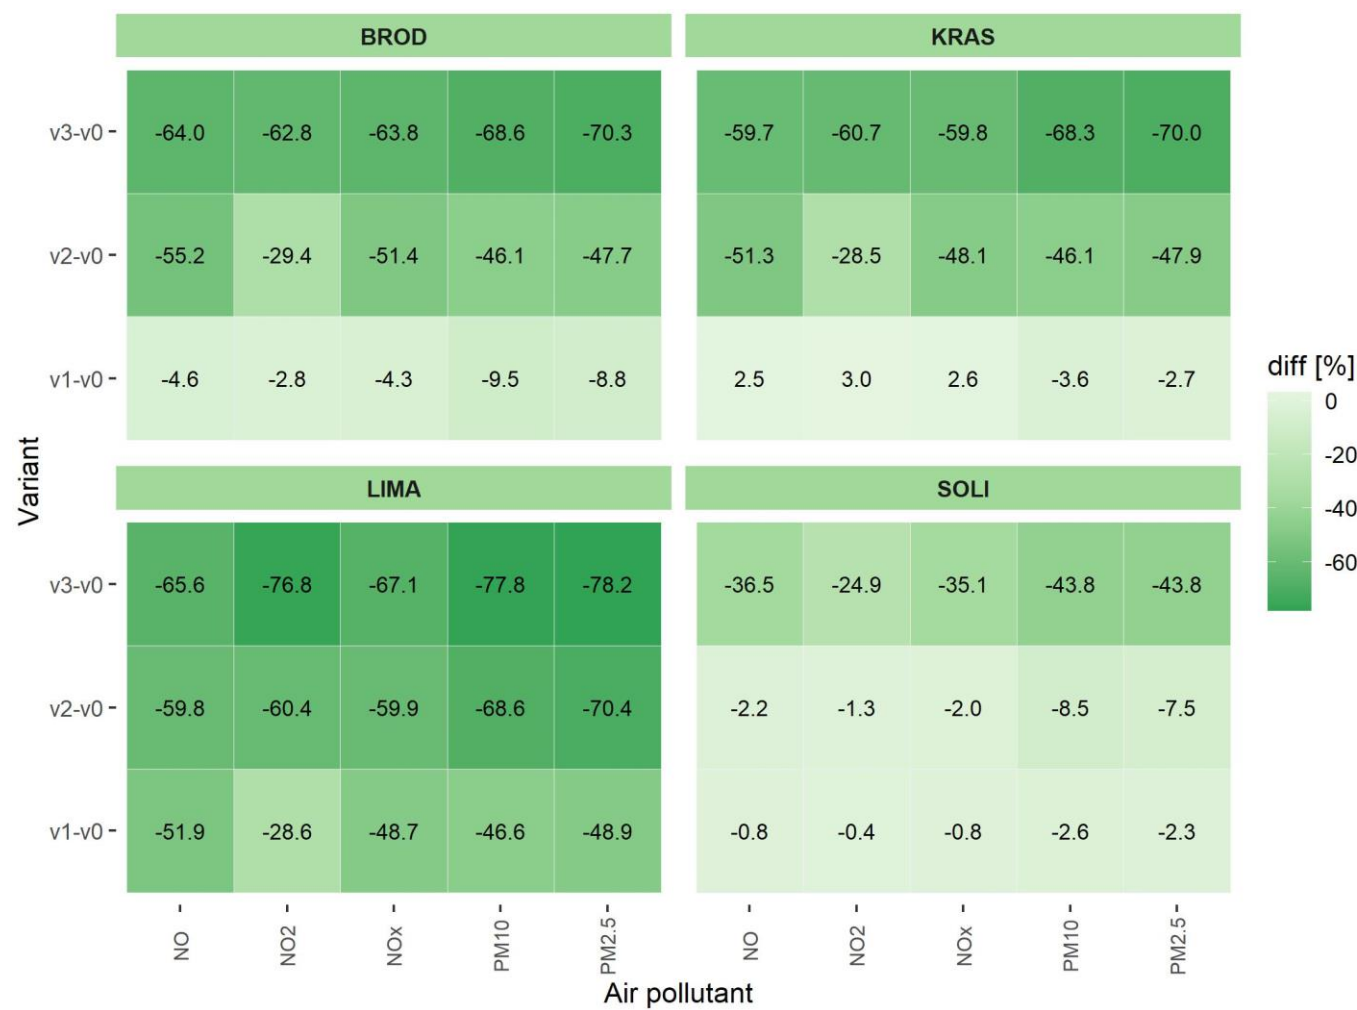

**Figure S2.** The matrix of percentage changes in the mean annual emission factors of the analyzed pollutants from individual street canyons obtained for variants v1, v2 and v3 compared to variant v0.

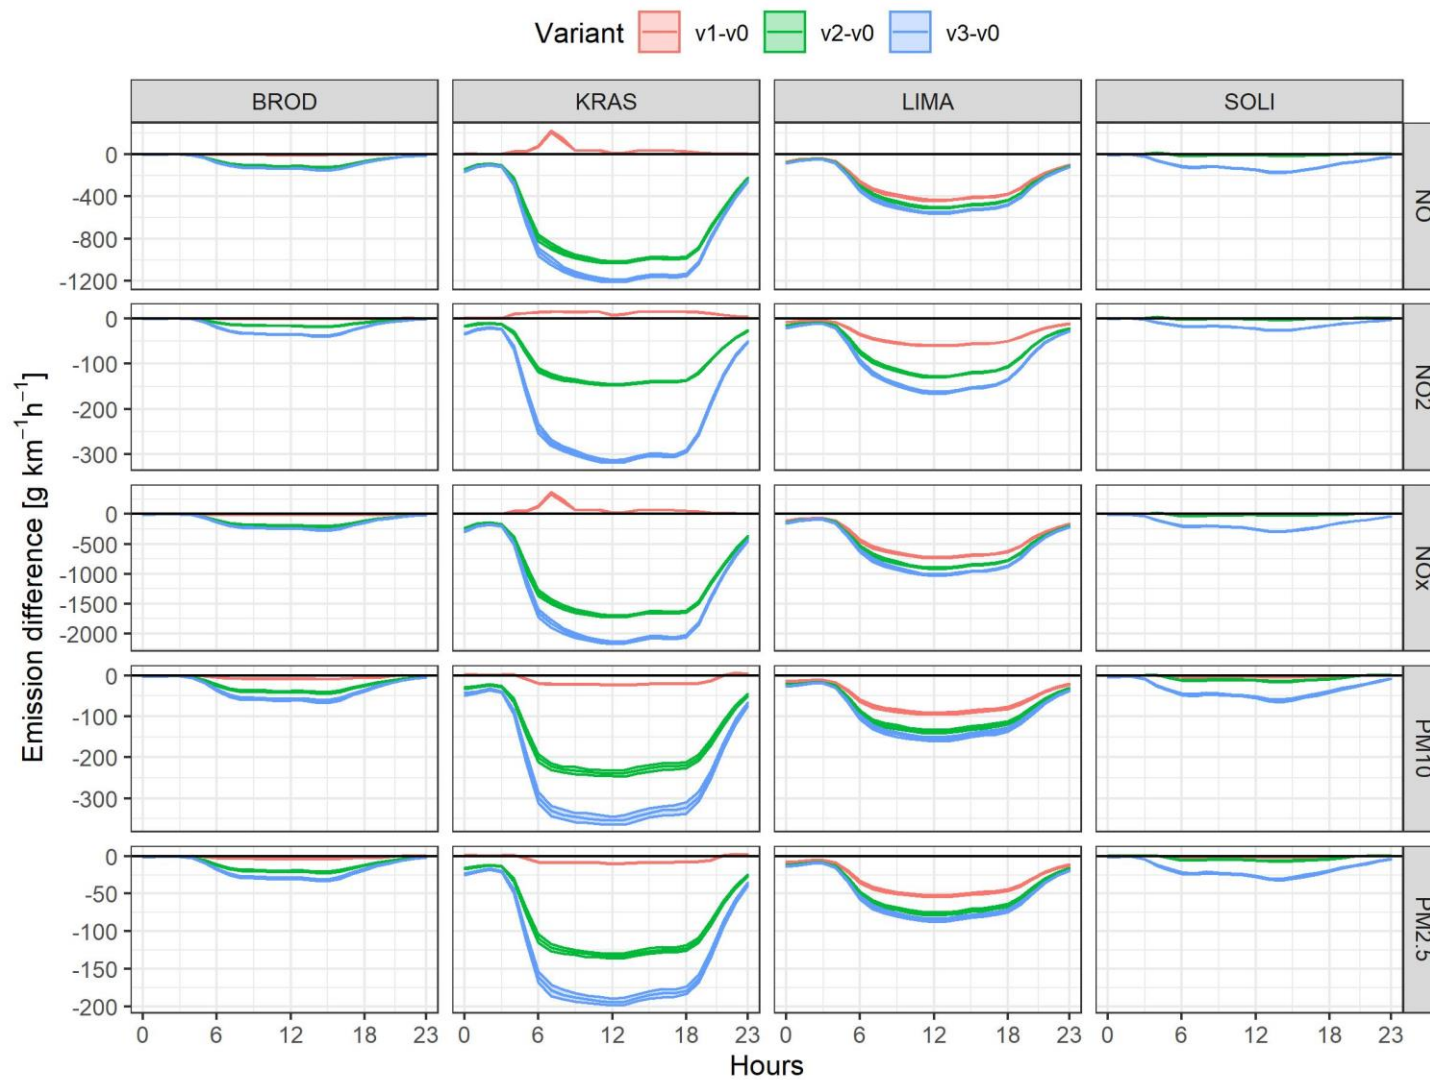

**Figure S3.** Daily variability of differences in the average 1-hour emissions of pollutants into the air from the analyzed canyons obtained for variants v1, v2 and v3 in relation to variant v0 (with 95% confidence intervals).

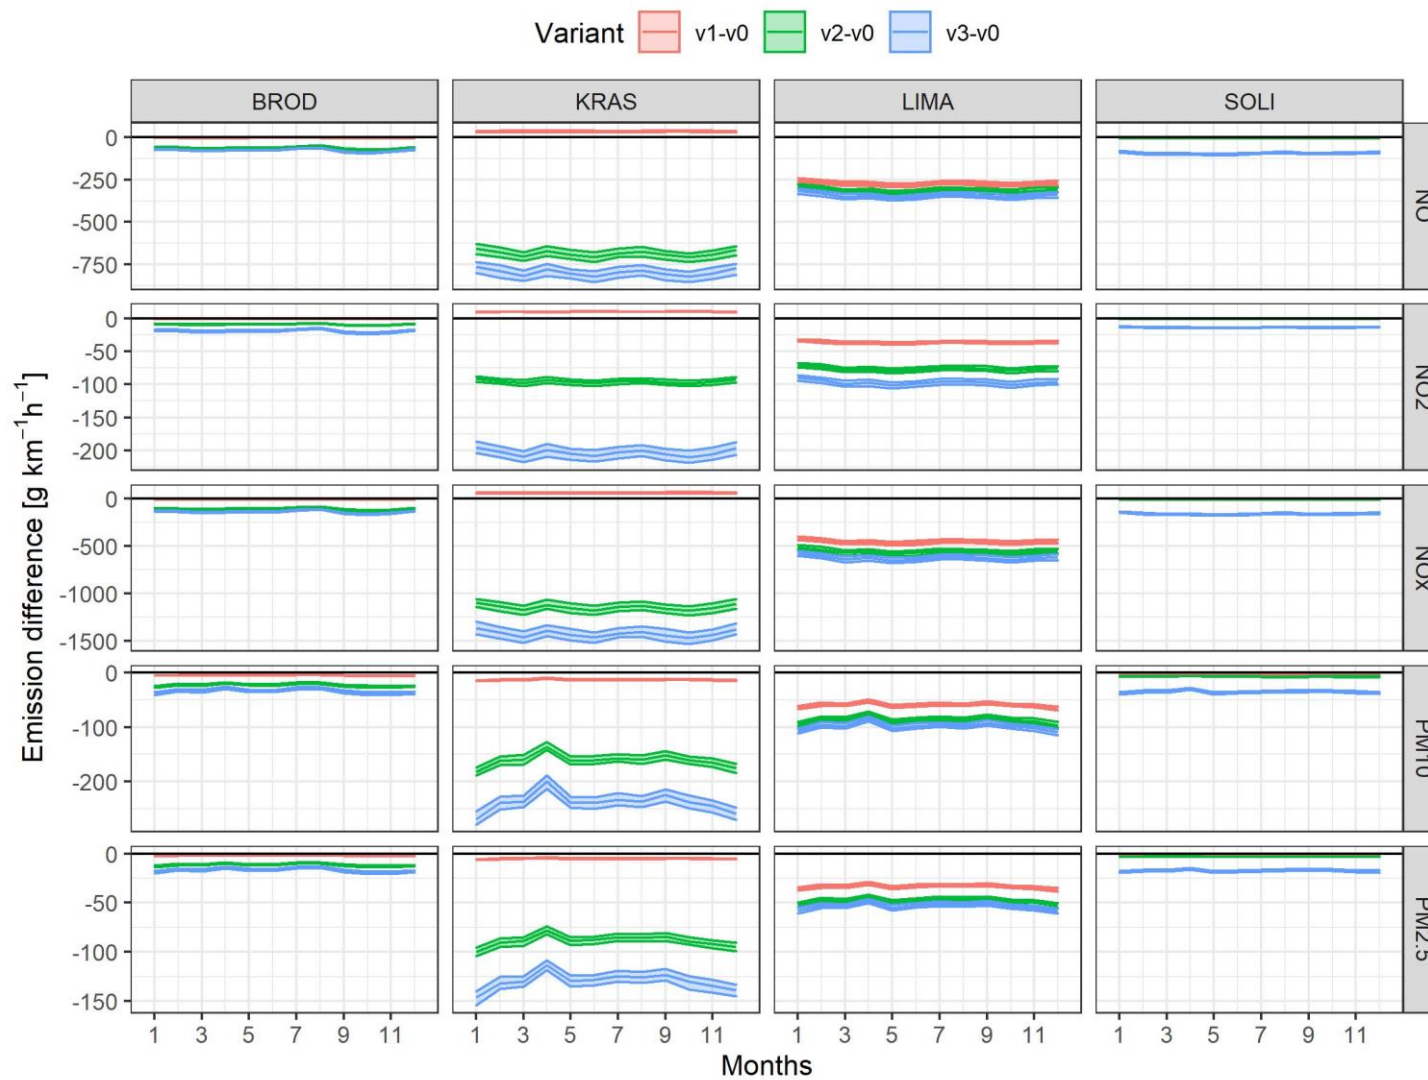

**Figure S4.** The annual variability of differences in the average monthly emissions of pollutants to the air from the analyzed canyons obtained for variants v1, v2 and v3 in relation to variant v0 (with 95% confidence intervals).

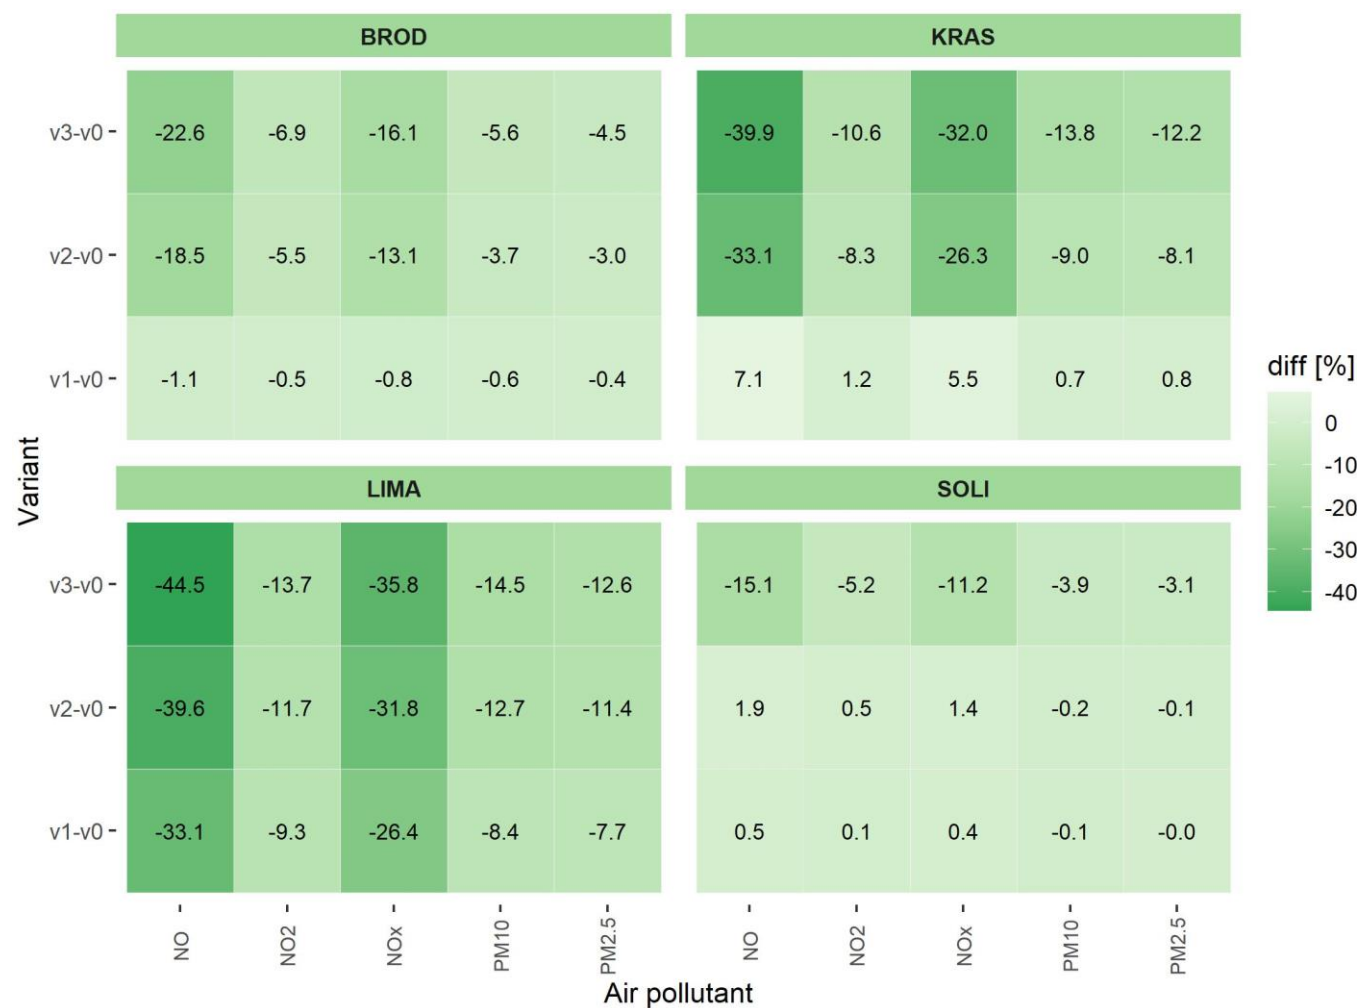

**Figure S5.** The matrix of percentage changes in the mean annual concentrations of the analyzed air pollutants in individual street canyons obtained for variants v1, v2 and v3 compared to variant v0 (including background pollution). The percentage reductions in concentrations specified as -0.0 represent a level of reduction in concentrations that is less than 0.05 %.

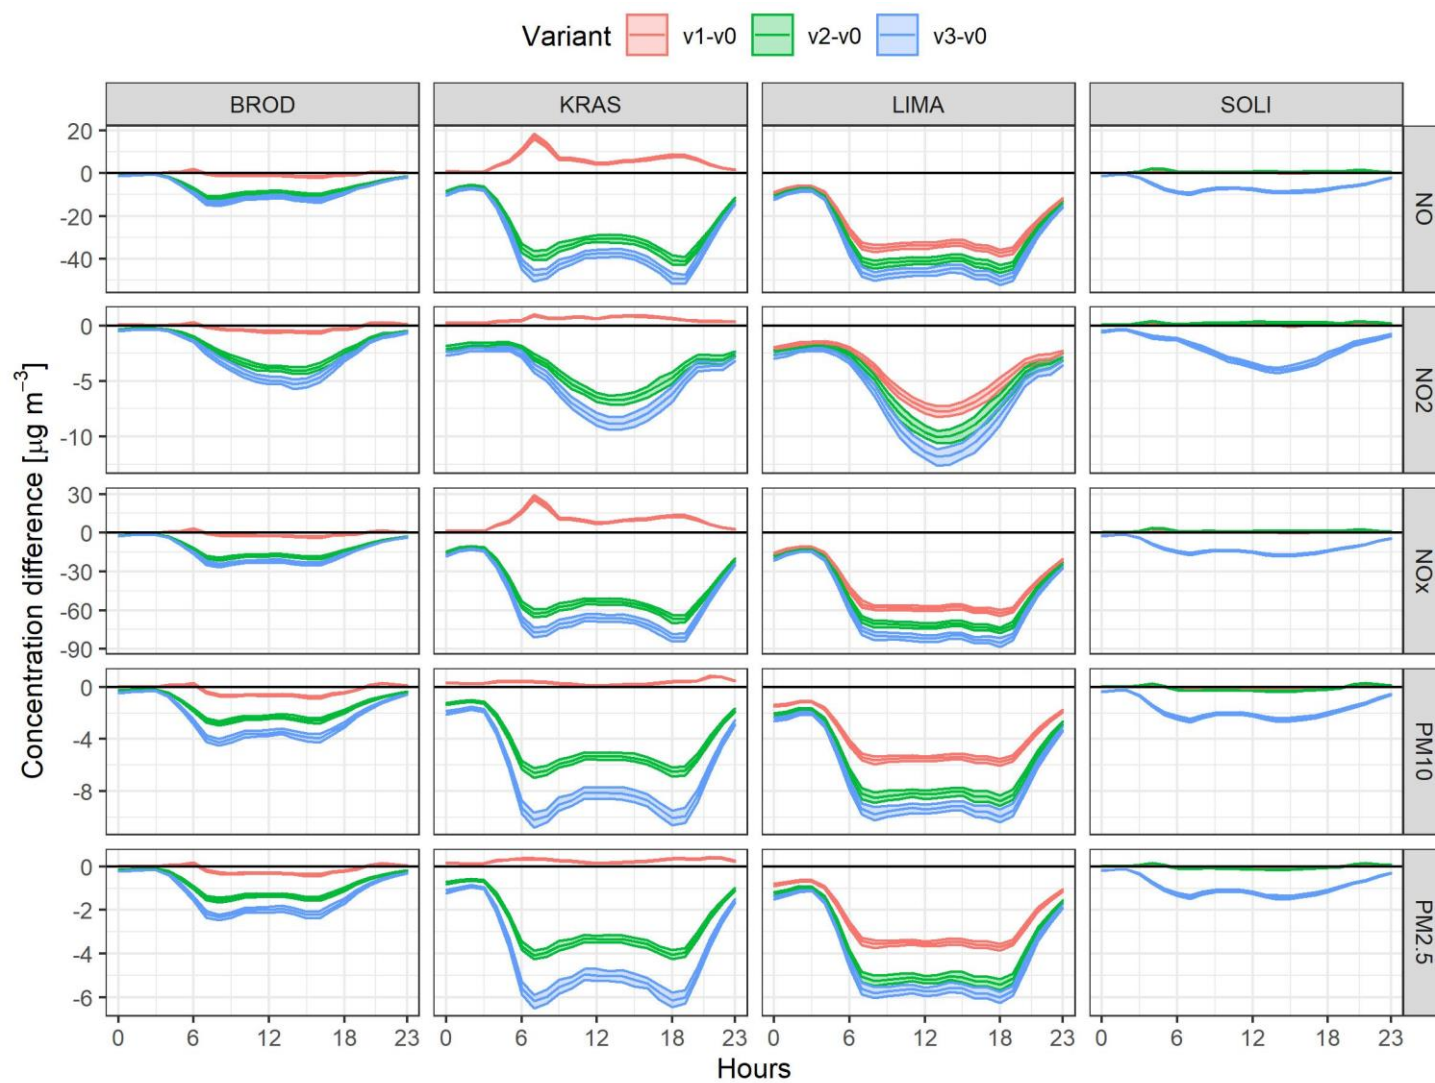

**Figure S6.** Daily variability of absolute differences in the mean 1-hour pollutant concentrations in the air in the analyzed canyons obtained for variants v1, v2 and v3 in relation to variant v0 (with 95% confidence intervals).

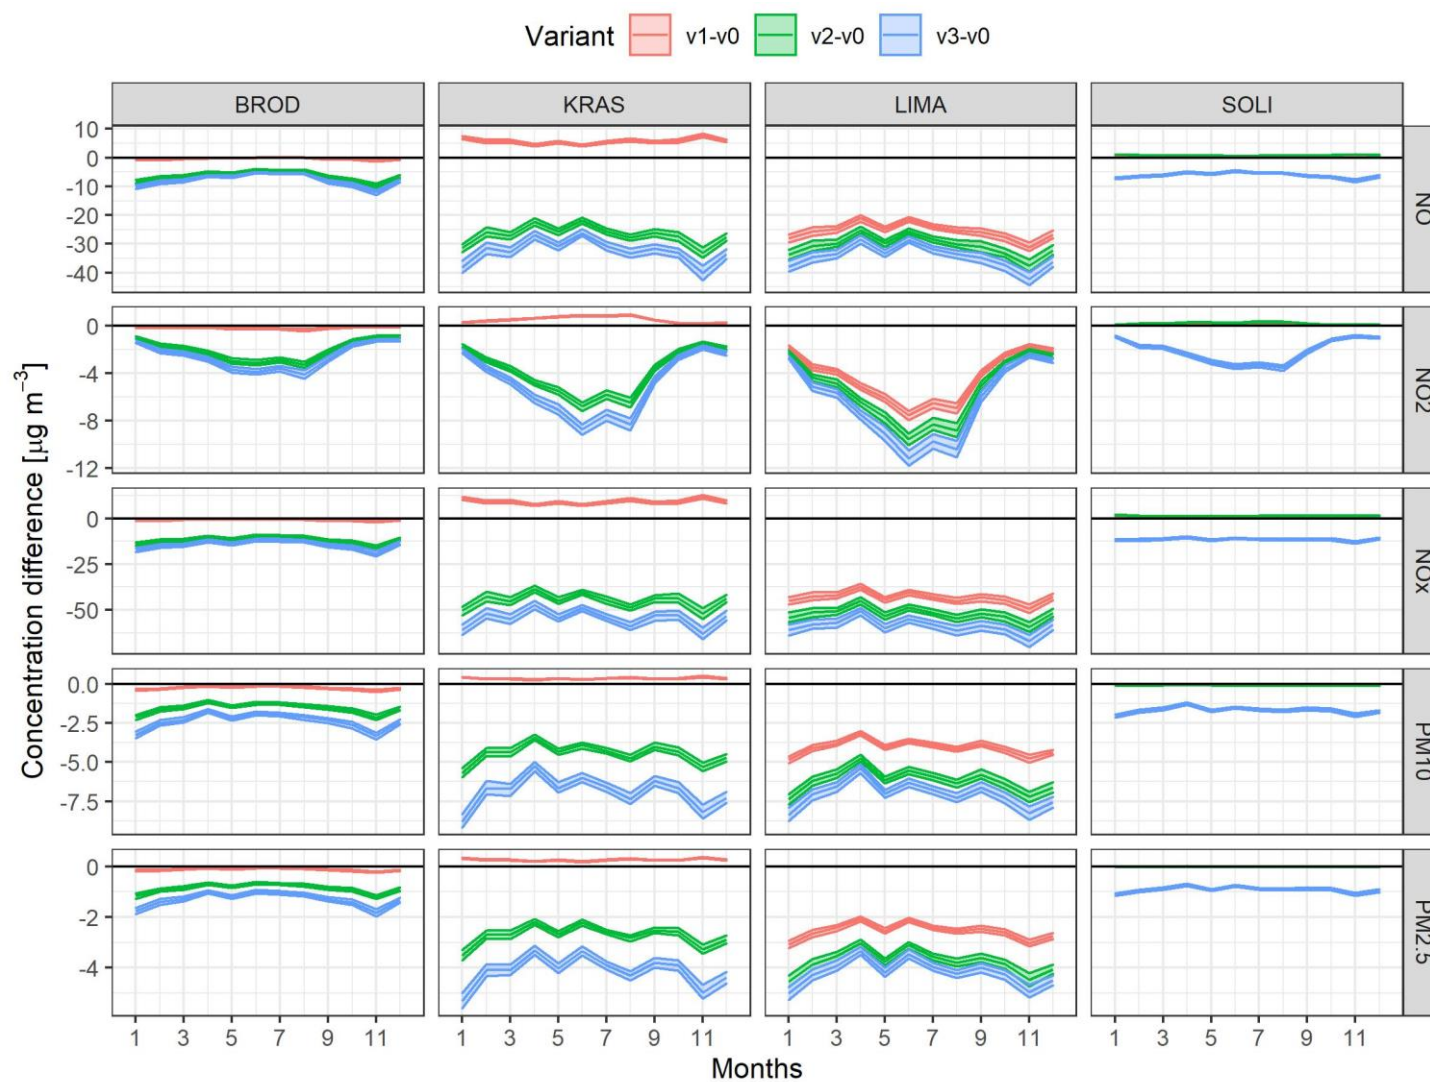

**Figure S7.** The annual variability of absolute differences in the mean 1-hour pollutant concentrations in the air in the analyzed canyons obtained for variants v1, v2 and v3 in relation to variant v0 (with 95% confidence intervals).
